# Supplementary material
Source: PubMed Central journal article supplement (PMC1937572)

*Merluccius productus*  
1989-1997

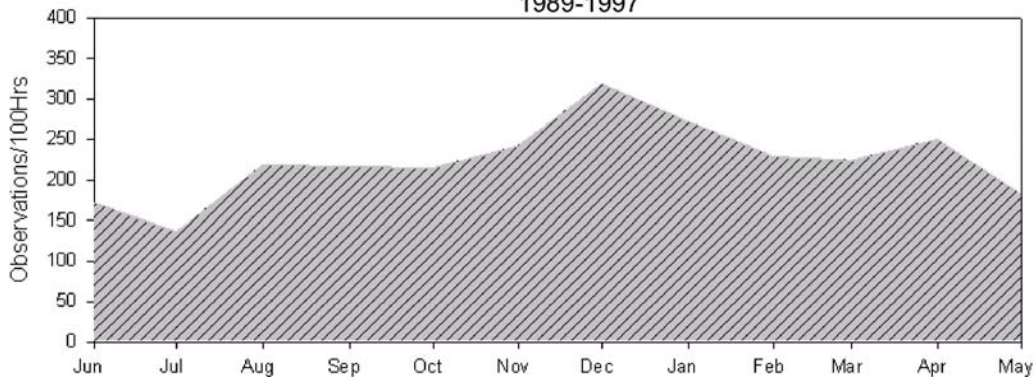

*Dosidicus gigas* and Upwelling Index  
1997-2005

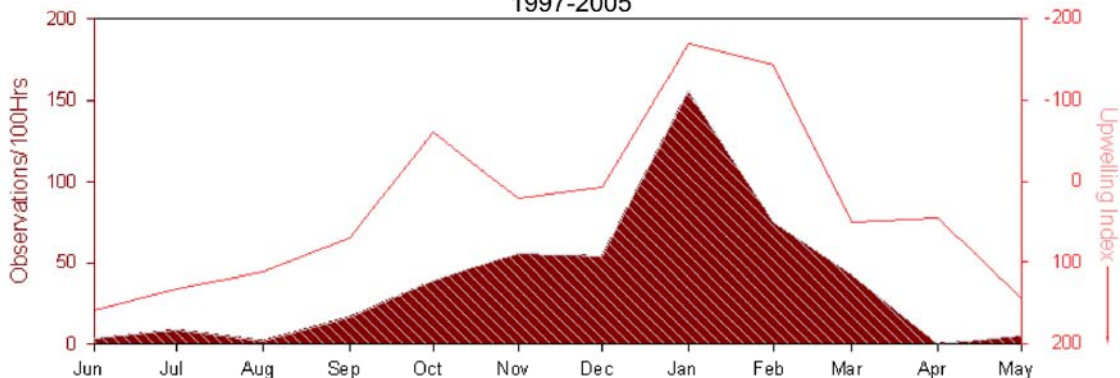

*Merluccius productus*  
1997-2005

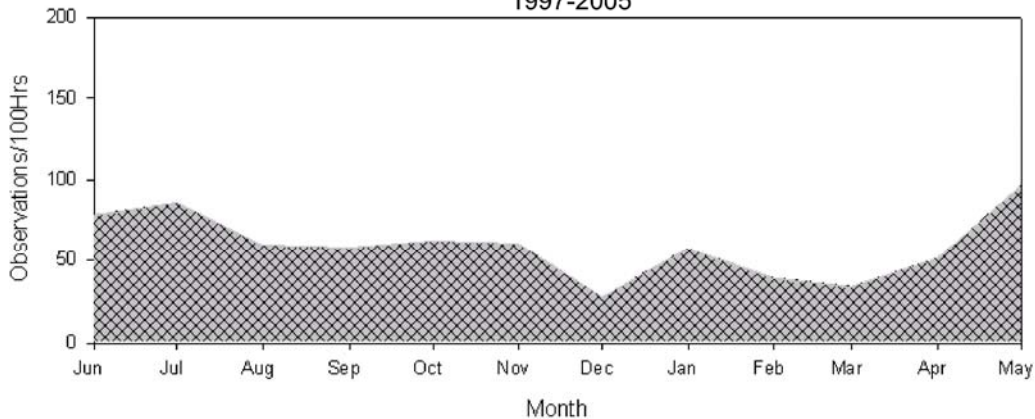

Supplement: pnas_0702043104_1.pdf [file pnas_0702043104_1.pdf]
